# Supplementary material for: Revealing the Immune Heterogeneity between Systemic Lupus Erythematosus and Rheumatoid Arthritis Based on Multi-Omics Data Analysis
Source: Int J Mol Sci. 2022 May 5;23(9):5166. doi: 10.3390/ijms23095166 (PMC9101622; doi:10.3390/ijms23095166)
Supplement: Supplementary file 1 [file ijms-23-05166-s001.zip]

Archive with 6 entries (6 files):
- Supplementary_tables_caption.pdf
- Table S1.xlsx
- Table S2.xlsx
- Table S3.xlsx
- Table S4.xlsx
- Table S5.xlsx
