# Supplementary material for: Revealing the Immune Heterogeneity between Systemic Lupus Erythematosus and Rheumatoid Arthritis Based on Multi-Omics Data Analysis
Source: Int J Mol Sci. 2022 May 5;23(9):5166. doi: 10.3390/ijms23095166 (PMC9101622; doi:10.3390/ijms23095166)
Supplement: Supplementary file 1 [file ijms-23-05166-s001.zip › Table S1.xlsx]

## Sheet: Sheet1
Table S1: Differentially expressed TRBV and TRBJ gene’s frequency in each SLE, RA and HC sample.
class	TRBJ1-5	TRBJ1-6	TRBJ2-3	TRBJ2-6	TRBV10-2	TRBV10-3	TRBV11-2	TRBV27	TRBV29-1	TRBV3-1	TRBV30	TRBV4-3	TRBV5-5	TRBV6-2	TRBV6-6	TRBV7-2
SLE_1_freq	0.0560911	0.024464	0.102757	0	0.00586076	0.0058951	0	0.0925311	0	0.0219213	0.0784248	0.028778	0.134124	0.077249	0	0.138471
SLE_2_freq	0.0770602	0.0108687	0.0723314	0.012183	0	0.0231145	0.0311309	0.0985006	0.0176874	0.0216063	0.101212	0.0310014	0.0559164	0.0700051	0.085032	0.148636
SLE_3_freq	0.0249742	0	0.0831204	0	0	0	0.0657588	0.0998698	0.110542	0	0.164952	0.0679885	0	0.0908643	0	0
SLE_4_freq	0.0265316	0.0268076	0.0661997	0.00683869	0	0.0304553	0.0616846	0.0315276	0.0342205	0.0372024	0.039508	0.0643447	0.0288424	0.137963	0.145533	0.342607
SLE_5_freq	0.0230052	0.0117732	0.0923562	0.0082991	0.00285862	0.0229344	0.092169	0.0643987	0.0298565	0.023934	0.0595457	0	0	0.0506143	0.0741924	0.0538651
SLE_6_freq	0.0257434	0.00973484	0.0911136	0.00101575	0	0.0274906	0.0716332	0.0330732	0.0504957	0.0236325	0.0877352	0	0.0103073	0.0494234	0.199672	0.0964212
RA_1_freq	0.0670295	0.0439025	0.0568203	0.00662693	0.00150237	0.0616896	0.0257366	0.0649107	0.105161	0.110567	0.0271815	0	0.0440327	0	0.0605356	0.322024
RA_2_freq	0.0428041	0.0309573	0.0352344	0.0274622	0.00181947	0.0236961	0.0616088	0.0379767	0.0645328	0.124135	0.0157374	0	0.0356789	0	0.0876115	0.491607
RA_3_freq	0.0194786	0.049663	0.0567901	0.00345438	0.00690009	0.0458566	0.00877597	0.0896943	0.0531991	0.0530578	0.0790884	0	0.0205256	0.0611253	0.0529351	0.160635
RA_4_freq	0.0468699	0.0703842	0.0699274	0.00401884	0.00624389	0.0659721	0.0100891	0.0754721	0.0702555	0.0636154	0.0466942	0	0.0332888	0.0176648	0.145194	0.227511
RA_5_freq	0.0324378	0.0264329	0.0754545	0.00812696	0.00583943	0.0342632	0.0364912	0.0613855	0.210207	0.0547515	0.0496369	0	0.0246709	0.0817049	0.112752	0.507595
RA_6_freq	0.034943	0.0156899	0.0468292	0.0140563	0.00354771	0.0445041	0.014904	0.0334605	0.135724	0.0568377	0.0631223	0	0.0401884	0.0468842	0.0803359	0.219926
HC_1_freq	0.021719	0.00426938	0.0772155	0.0217533	0	0.0261387	0.0119463	0.0606546	0.19699	0.0760688	0.0138432	0.0586024	0.00581608	0.174131	0.01288	0.182642
HC_2_freq	0.0267421	0.00238922	0.0536793	0.0269621	0.00586434	0.0589887	0.00628097	0.00765655	0.0652327	0.0523238	0.0137999	0.0337447	0	0.11663	0.00820127	0.016537
HC_3_freq	0.00820692	0.0303409	0.0878903	0.0107054	0.018792	0.00225311	0.015861	0.0254309	0.0656409	0.0453174	0.0166122	0	0.0070238	0.00366584	0.0438473	0.0458497
HC_4_freq	0.0267421	0.00238922	0.0536793	0.0269621	0.00586434	0.0589887	0.00628097	0.00765655	0.0652327	0.0392429	0.0137998	0.0337446	0	0.116629	0.00820123	0.016537
HC_5_freq	0.0176572	0.0457064	0.0681014	0.00767348	0.0134003	0.00399477	0.014462	0.00719222	0.0420901	0.0533516	0.0149171	0	0.0406348	0.0188823	0.0109344	0.036028
HC_6_freq	0.00820692	0.0303409	0.0878903	0.0107054	0.018792	0.00225311	0.015861	0.0254309	0.0656409	0.0453174	0.0166122	0	0.0070238	0.00366584	0.0438473	0.0458497
SLE_num	315	117	487	37	3	114	249	139	60	50	133	46	37	80	87	108
RA_num	298	271	354	55	21	214	113	132	212	127	79	0	32	30	59	181
HC_num	131	186	489	83	57	87	60	58	180	113	32	26	24	62	29	53
SLE_SUM_freq	0.0786517	0.0292135	0.121598	0.00923845	0.000666075	0.0253108	0.0552842	0.0308615	0.0133215	0.0111012	0.0295293	0.0102131	0.00821492	0.017762	0.0193162	0.0239787
RA_SUM_freq	0.0791711	0.0719979	0.0940489	0.0146121	0.00443319	0.0451763	0.0238548	0.0278657	0.0447541	0.0268102	0.0166772	0	0.00675533	0.00633312	0.0124551	0.0382098
HC_SUM_freq	0.0301774	0.0428473	0.112647	0.01912	0.0118948	0.0181553	0.0125209	0.0121035	0.0375626	0.023581	0.0066778	0.00542571	0.00500835	0.0129382	0.00605175	0.0110601
SLEvsHC_pvalue	0.0764895	0.557665	0.148703	0.0152984	0.0348305	0.58146	0.0256732	0.0141572	0.157328	0.0017178	0.00870655	0.501786	0.248742	0.834364	0.1115	0.220517
RAvsHC_pvalue	0.0175807	0.0951297	0.127365	0.214693	0.11267	0.15219	0.142606	0.0108856	0.50575	0.115886	0.0193357	0.0920368	0.0130636	0.288117	0.00289136	0.00529854
SLEvsRA_pvalue	0.883915	0.0225193	0.00685377	0.20363	0.0657517	0.00801651	0.118216	0.561116	0.0488269	0.00593701	0.0726009	0.045775	0.819179	0.042452	0.873603	0.0332403
