# Supplementary material for: Revealing the Immune Heterogeneity between Systemic Lupus Erythematosus and Rheumatoid Arthritis Based on Multi-Omics Data Analysis
Source: Int J Mol Sci. 2022 May 5;23(9):5166. doi: 10.3390/ijms23095166 (PMC9101622; doi:10.3390/ijms23095166)
Supplement: Supplementary file 1 [file ijms-23-05166-s001.zip › Table S2.xlsx]

## Sheet: Sheet1
Table S2: Differentially expressed IGHV and IGHJ gene’s frequency in each SLE, RA and HC sample.
class	IGHJ2	IGHJ5	IGHJ6	IGHV1-18	IGHV3-9	IGHV1-69	IGHV2-5	IGHV3-30	IGHV3-74	IGHV5-51	IGHV3-53	IGHV3-33	IGHV1-46	IGHV7-4-1	IGHV1-8	IGHV2-70	IGHV3-13	IGHV3-66	IGHV2-26	IGHV1-NL1	IGHV3-41	IGHV4-30-4
SLE-1_freq	0.0151375	0.0912343	0.169916	0.0590426	0.0169035	0.0607737	0.0733937	0.00416847	0.0627885	0.0513593	0.0847355	0.0613222	0.0480343	0.112119	0.0457404	0.27518	0.0913403	0.171386	0.0472185	0	0.210056	0
SLE-2_freq	0.0132606	0.087024	0.17064	0.0444675	0.0180009	0.0973942	0.0872399	0.0164884	0.0508627	0.0591264	0.0544096	0.0771729	0.0627694	0.174781	0.0637697	0.216157	0.0651226	0.109456	0.0208305	0.0419475	0.279306	0
SLE-3_freq	0.0171862	0.065135	0.257648	0.0463595	0.0878981	0.0315442	0.0410667	0.236264	0.027056	0.0516414	0.0670124	0.118433	0.0457482	0.0287607	0.00796383	0.312396	0.0998464	0.332305	0.12578	0	0	0
SLE-4_freq	0.00792237	0.0878367	0.278892	0.0444676	0.0814939	0.0559816	0.0408932	0.190711	0.0379734	0.0304231	0.0518132	0.129306	0.0506133	0.0583312	0.052127	0.206343	0.0906095	0.151422	0.086774	0.12	0.109287	0.144133
SLE-5_freq	0.00610532	0.0819748	0.278773	0.0451935	0.0413382	0.0858308	0.0392571	0.152368	0.0305039	0.0278588	0.0637631	0.251962	0.0550214	0.15412	0.0482364	0.178201	0.0388703	0.158239	0.12982	0.0207616	0.0089469	0.0735091
SLE-6_freq	0.00600204	0.079458	0.293948	0.0464538	0.0411707	0.0792095	0.032087	0.19991	0.0321795	0.0294847	0.0522131	0.229976	0.0530403	0.155844	0.0469612	0.184852	0.038564	0.146349	0.14928	0.0210357	0.0213468	0.0787991
RA-1_freq	0.00453905	0.0839912	0.149759	0.0303689	0.0169163	0.0485713	0.015315	0.229964	0.0360637	0.03841	0.028531	0.0310242	0.0535561	0.0519336	0.0160042	0.205258	0.0334672	0.199595	0.14625	0.00713637	0	0.46643
RA-2_freq	0.00339175	0.0793366	0.139989	0.0245639	0.0272573	0.0559303	0.0257926	0.24531	0.0350762	0.0227191	0.0430068	0.00510286	0.0536006	0.0478454	0.0119146	0.154191	0.0629049	0.268439	0.138543	0.0309624	0	0
RA-3_freq	0.00252804	0.0896648	0.282321	0.0200735	0.00118258	0.049083	0.0458267	0.313436	0.0235573	0.0226174	0.0285398	0.0026234	0.0212842	0.0397113	0.00200062	0.00845065	0.0180932	0.159688	0.106978	0	0.128776	0.829887
RA-4_freq	0.00341661	0.104703	0.287447	0.0323443	0.000571788	0.0419313	0.0411129	0.287673	0.0194104	0.0217737	0.0323751	0.0293324	0.0104342	0.062093	0.0106854	0	0.0407489	0.13804	0.230196	0.0212549	0.043413	0.72803
RA-5_freq	0.00638766	0.0965959	0.148938	0.0342703	0.00100062	0.0420801	0.0129198	0.286645	0.00275152	0.0147152	0.0224022	0.0512506	0.0101831	0	0.00810075	0.0497732	0.0527166	0.0296743	0.0228558	0.00584682	0.176126	0.598419
RA-6_freq	0.00971856	0.0928966	0.159009	0.0334109	0.00100764	0.0482139	0.0111835	0.272103	0.0146202	0.0194734	0.0226969	0.0984118	0.0190332	0	0.0202353	0.0385294	0.0262496	0.0154026	0.0124877	0.0320137	0	0.711131
HC-1_freq	0.00538211	0.0756255	0.156252	0.0463788	0.015217	0.135705	0.0051188	0.308706	0.022311	0.0405668	0.0132117	0.048916	0.106231	0.0432042	0	0.306977	0.00974147	0.0393454	0.0479007	0	0.248059	0
HC-2_freq	0.00697024	0.0874667	0.150498	0.0430568	0.0282879	0.0427748	0.0101551	0.254425	0.0330007	0.0767784	0	0.0377644	0.0322712	0	0.039067	0	0.0455533	0.0954134	0.0163125	0	0.313436	0
HC-3_freq	0.00646419	0.0648836	0.13648	0.0542672	0.0265174	0.121483	0.0252402	0.21728	0.061119	0.0612656	0.0432352	0.0496726	0.0388959	0.0161872	0.0731968	0.342967	0.121943	0.0257021	0.015511	0	0.15801	0
HC-4_freq	0.00704885	0.0847214	0.15775	0.0470799	0.0293239	0.0438832	0.0104302	0.261391	0.0342225	0.079721	0	0.0393723	0.0383239	0	0.0337512	0	0.0532553	0.112435	0.0219556	0	0.264165	0
HC-5_freq	0.00499902	0.0752176	0.115553	0.0563656	0.0384631	0.140271	0.0348283	0.0664711	0.0332271	0.0448892	0.0484661	0.051887	0.0216884	0.0266025	0.0949122	0.3658	0.0242891	0.138682	0.0916982	0	0.526819	0.0513802
HC-6_freq	0.00646419	0.0648836	0.13648	0.0542672	0.0265174	0.121483	0.0252402	0.21728	0.061119	0.0612656	0.0432352	0.0496726	0.0388959	0.0161872	0.0731968	0.342967	0.121943	0.0257021	0.015511	0	0.15801	0
SLE_num	2774	23171	71449	6871	5192	7925	3694	14333	2486	2258	3871	12724	2249	5683	1500	4692	472	1486	479	79	56	165
RA_num	203	2668	5092	509	174	605	300	3097	210	206	246	233	187	211	62	344	73	265	69	10	20	162
HC_num	217	1597	2799	863	425	907	162	1305	252	294	177	209	132	60	193	562	72	73	13	0	54	1
SLE_SUM_freq	0.0137262	0.114654	0.353542	0.0364285	0.0275268	0.0420166	0.0195848	0.0759904	0.0131802	0.0119714	0.0205232	0.0674598	0.0119237	0.03013	0.00795267	0.0248759	0.00250244	0.00787844	0.00253955	0.00041884	0.0002969	0.000874793
RA_SUM_freq	0.0093557	0.122961	0.234676	0.0227904	0.00779081	0.0270887	0.0134324	0.138668	0.0094027	0.00922361	0.0110146	0.0104325	0.00837288	0.00944748	0.00277604	0.0154025	0.00326856	0.0118653	0.00308946	0.000447748	0.000895496	0.00725351
HC_SUM_freq	0.0121725	0.0895832	0.157009	0.0476848	0.0234833	0.050116	0.00895127	0.0721074	0.0139242	0.0162449	0.00978009	0.0115482	0.00729362	0.00331528	0.0106642	0.0310532	0.00397834	0.00403359	0.000718311	0	0.00298376	5.52547e-05
SLEvsHC_pvalue	0.0640065	0.250314	0.00646544	0.439155	0.16666	0.160457	0.0120702	0.128458	0.946104	0.0520428	0.00800971	0.0281915	0.626554	0.00884948	0.622785	0.975579	0.735477	0.0223648	0.0415723	0.123649	0.0405133	0.162485
RAvsHC_pvalue	0.325149	0.0150063	0.129298	6.15985e-05	0.00731579	0.0341079	0.39754	0.199889	0.0501872	0.00115329	0.63526	0.52692	0.256691	0.234367	0.0330472	0.100391	0.297347	0.204452	0.0789408	0.0343332	0.00898349	0.006441
SLEvsRA_pvalue	0.0316389	0.117609	0.231022	0.00020553	0.0226702	0.0856454	0.0373198	0.0168324	0.038199	0.0229609	0.000576265	0.0183758	0.0303826	0.0190001	0.00676935	0.00498467	0.0408434	0.421004	0.690262	0.39121	0.435137	0.00826477
