# Supplementary material for: Revealing the Immune Heterogeneity between Systemic Lupus Erythematosus and Rheumatoid Arthritis Based on Multi-Omics Data Analysis
Source: Int J Mol Sci. 2022 May 5;23(9):5166. doi: 10.3390/ijms23095166 (PMC9101622; doi:10.3390/ijms23095166)
Supplement: Supplementary file 1 [file ijms-23-05166-s001.zip › Table S3.xlsx]

## Sheet: Sheet1
Table S3: Each immune cell type’s proportion in each SLE, RA and HC sample.
cell type	number	condition	sample_total_number	Freq
B	309	HC1	5488	0.0563047
CD14+ mono	675	HC1	5488	0.122996
CD4+ T	1875	HC1	5488	0.341655
CD8+ T	593	HC1	5488	0.108054
DC	112	HC1	5488	0.0204082
FCGR3A+ mono	124	HC1	5488	0.0225948
mixed	369	HC1	5488	0.0672376
NK	1374	HC1	5488	0.250364
platelet	57	HC1	5488	0.0103863
B	162	HC2	2942	0.0550646
CD14+ mono	209	HC2	2942	0.0710401
CD4+ T	925	HC2	2942	0.314412
CD8+ T	118	HC2	2942	0.0401088
DC	32	HC2	2942	0.010877
FCGR3A+ mono	76	HC2	2942	0.0258328
mixed	98	HC2	2942	0.0333107
NK	1297	HC2	2942	0.440857
platelet	25	HC2	2942	0.00849762
B	463	HC3	5301	0.087342
CD14+ mono	457	HC3	5301	0.0862101
CD4+ T	1278	HC3	5301	0.241087
CD8+ T	138	HC3	5301	0.0260328
DC	67	HC3	5301	0.0126391
FCGR3A+ mono	136	HC3	5301	0.0256555
mixed	247	HC3	5301	0.046595
NK	2491	HC3	5301	0.469911
platelet	24	HC3	5301	0.00452745
B	1145	RA	10483	0.109224
CD14+ mono	871	RA	10483	0.0830869
CD4+ T	2825	RA	10483	0.269484
CD8+ T	1767	RA	10483	0.168559
DC	118	RA	10483	0.0112563
FCGR3A+ mono	412	RA	10483	0.0393017
mixed	357	RA	10483	0.0340551
NK	2983	RA	10483	0.284556
platelet	5	RA	10483	0.000476963
B	765	SLE1	5867	0.13039
CD14+ mono	1154	SLE1	5867	0.196693
CD4+ T	393	SLE1	5867	0.0669848
CD8+ T	108	SLE1	5867	0.018408
DC	36	SLE1	5867	0.00613601
FCGR3A+ mono	64	SLE1	5867	0.0109085
mixed	2404	SLE1	5867	0.409749
NK	631	SLE1	5867	0.107551
platelet	312	SLE1	5867	0.0531788
B	99	SLE2	1322	0.0748865
CD14+ mono	452	SLE2	1322	0.341906
CD4+ T	71	SLE2	1322	0.0537065
CD8+ T	5	SLE2	1322	0.00378215
DC	13	SLE2	1322	0.00983359
FCGR3A+ mono	45	SLE2	1322	0.0340393
mixed	314	SLE2	1322	0.237519
NK	211	SLE2	1322	0.159607
platelet	112	SLE2	1322	0.0847201
B	605	SLE3	8043	0.0752207
CD14+ mono	3718	SLE3	8043	0.462265
CD4+ T	1577	SLE3	8043	0.196071
CD8+ T	544	SLE3	8043	0.0676365
DC	113	SLE3	8043	0.0140495
FCGR3A+ mono	400	SLE3	8043	0.0497327
mixed	174	SLE3	8043	0.0216337
NK	899	SLE3	8043	0.111774
platelet	13	SLE3	8043	0.00161631
