# Supplementary material for: Revealing the Immune Heterogeneity between Systemic Lupus Erythematosus and Rheumatoid Arthritis Based on Multi-Omics Data Analysis
Source: Int J Mol Sci. 2022 May 5;23(9):5166. doi: 10.3390/ijms23095166 (PMC9101622; doi:10.3390/ijms23095166)
Supplement: Supplementary file 1 [file ijms-23-05166-s001.zip › Table S4.xlsx]

## Sheet: Sheet1
Table S4: Differentially expressed genes (DEG) in each immune cell type between SLE group and HC group.
CD4+ T	CD8+ T	CD14+ mono	FCGR3A+ mono	NK	B	DC	platelet
HBB	CST3	HBA2	CKB	EAF2	HBA2	UBE2T	FGFBP2
FCN1	TYROBP	CXCL3	CDKN1C	MAFB	HBB	MZB1	NR4A2
FCER1G	CCL3	CCL4L2	MS4A6A	HBB	GNLY	HBA2	GZMK
IFI27	TYMP	IL1RN	AP1S2	CCDC88A	NKG7	CD79B	NR4A1
CCL3	IFI44L	IFI27	LYZ	NCAPG	CST3	SPINK2	HLA-DRB5
CST3	IFITM3	TNF	S100A12	SHCBP1	S100A8	CD63	GZMH
TYROBP	HLA-DRA	SIGLEC1	SOD2	NRIP1	MT1E	TIMP1	RUNX3
IFITM3	LST1	CXCL2	TXN	ID1	S100A9	HBB	HLA-DRB1
LST1	IFI6	LTB	S100A8	FBXO5	LST1	PLA2G16	PRF1
MT1G	S100A8	FFAR2	RPSA	CLC	DUSP2	IL7R	PPIB
EPSTI1	S100A9	MT1G	MS4A7	BPI	ARPC2	DRD4	IL32
IFI44L	YBX1	PTAFR	VAMP5	S100A9	HLA-DQA1	PSMA4	CD247
TYMP	IL32	ANKRD28	CD63	CCL3	LYZ	MT1G	ODF3B
NR4A2	PIM2	CES1	HLA-DMA	PTX3		DPYD	MPO
S100A8		RASGEF1B	MT1G	NUSAP1		CYB561A3	BPI
S100A9		RETN	APOBEC3B	FGL2		CSF2RB	ARL4C
PIM2		MSRB1	SUB1	CPPED1		HMOX1	APOBEC3A
NKG7		EPSTI1	HLA-DPB1	CPVL		MYBL2	ITGB2
IFI6		SAMSN1	FPR1	IFI27		ANXA1	VNN2
CISH		IFI6	DUSP6	UGCG		IGFBP7	GIMAP7
GZMK		IFI44		S100A8		ALDH3B1	BCL11B
PIM1		GNLY		CD300LF		IRF8	AZU1
NPM1		ODF3B		CLEC4A		RGS1	CEBPB
ISG15		QKI		SAP30		APLP2	IL7R
FLT3LG		CCL4		EHBP1L1			TNFAIP3
H3F3A		ARRB2		CD69			RBM47
CD3G		NUMB		SLC11A1			RSAD2
YBX1		SLC11A1		CD247			S100A12
LYZ		ATP6V1B2		CLIC3			ISG20
		DUSP6		SLC7A7			HLA-DRA
