# Supplementary material for: Revealing the Immune Heterogeneity between Systemic Lupus Erythematosus and Rheumatoid Arthritis Based on Multi-Omics Data Analysis
Source: Int J Mol Sci. 2022 May 5;23(9):5166. doi: 10.3390/ijms23095166 (PMC9101622; doi:10.3390/ijms23095166)
Supplement: Supplementary file 1 [file ijms-23-05166-s001.zip › Table S5.xlsx]

## Sheet: Sheet1
Table S5: Differentially expressed genes (DEG) in each immune cell type between RA group and HC group.
CD4+ T	CD8+ T	CD14+ mono	FCGR3A+ mono	B	DC	NK
IFI27	GZMK	HBB	GZMB	IFI27	UBE2T	S100A9
USP18	RHOB	CCL4	FCGR3B	CD38	IFI27	IFI27
FAM13A	S100B	IFI27	CCL4	CCL4	PNOC	IFNG
SGK1	PMAIP1	SERPINB2	MT1X	CD8B	TCL1A	LGALS9
IFI44	PELI1	CD3G	IFI27	WEE1	LAPTM4B	OAS1
UGCG	IRF7	MS4A1	CD69	CD3G	MT1G	HSPA1B
IRF7	MYADM	GNLY	GZMA	PPP1R14A	CCL5	S100A8
HLA-DRB5	ARL4A	CD3D	CD3D	CD3E	ITM2A	PLSCR1
NKG7	CISH	RGCC	CD3E	IFI44	CLEC11A	PELI1
GADD45A	SGK1	IL7R	ARHGEF40	TYMP	SERPINA1	CCL3
MT1E	UBE2S	G0S2	CD7	NEIL1	PTCRA	CD38
CORO1B	PPP1R15A	CD7	GNLY	PPP1R14B	TMIGD2	YBX3
FOS	FOS	CST7	C1QA	HIST1H1C	C1orf54	CD27
JUNB	BIRC3	NRG1	CD3G	MT1E	ENHO	SIT1
RGS1	TUBB4B	NUDT1	CCL5	DUSP5	IFI30	IFI44
IFI44L	JUNB	RPLP0	ABI3	ANXA2	LAMP5	ADA
MT1G	YBX3	LGALS3BP	GZMH	CD3D	BASP1	HLA-DQA2
FOSB	KLF6	MT1G	IFIT2	STAT1	CEP170	MX1
CITED2	DUSP1	GRASP	HES1	DUSP2	EGFL7	GBP1
NFKBIZ	TAGLN2	CD69	IL32	MAP3K8	HIST1H2AC	GZMK
JUN	TNFAIP3	RPSA	DOK2	LGALS1	HBA2	CHI3L2
XAF1	PIM2	NPM1	FCN1	CD7	STMN1	LAG3
PIM1	FOSB	IL32	HMGB1	EPSTI1	NKG7	HIST1H1C
	CD69	SEPT6	MT1G	ARL4A	ACTB	TYMS
	IFI44L	LTB	CITED2	RGCC	NUCB2	FABP5
	TUBA1A	GZMH	SLC11A1	TLE1	FAM129C	GBP4
	JUN	ANKRD28	CD14	TNFAIP3	DAD1	PTMS
	ZFP36	APOBEC3B		MX1	ID1	KLRC1
		LDHB		IL7R	CD74	HIST1H1D
		NKG7		S100A4	TMSB4X	MT1G
